# Supplementary material
Source: publisher figshare collection journal article supplement (https://gsajournals.figshare.com/ndownloader/files/27742032)
Supplement: Supplementary file 1 [file 27742032]

Table S4. InterPro categories related to transcription factors

| InterPro | InterPro Name | ESALQ  1638 | MROB | MANIB | MANIA | MANIE | MBRU | MGUI | MMAJ | MACR | MALB | MRIL |
| --- | --- | --- | --- | --- | --- | --- | --- | --- | --- | --- | --- | --- |
| IPR001138 | Zn(2)-C6 fungal-type DNA-binding domain | 167 | 178 | 166 | 167 | 165 | 159 | 183 | 167 | 138 | 91 | 114 |
| IPR007219 | Transcription factor domain, fungi | 152 | 143 | 144 | 145 | 145 | 142 | 153 | 142 | 117 | 78 | 80 |
| IPR021858 | Fungal transcription factor* | 65 | 60 | 59 | 61 | 61 | 58 | 59 | 56 | 44 | 26 | 35 |
| IPR012340 | Nucleic acid-binding, OB-fold | 52 | 52 | 53 | 51 | 51 | 52 | 52 | 56 | 51 | 50 | 48 |
| IPR009057 | Homeobox-like domain superfamily | 29 | 29 | 31 | 30 | 30 | 30 | 32 | 28 | 27 | 31 | 30 |
| IPR001005 | SANT/Myb domain | 16 | 17 | 18 | 14 | 15 | 17 | 17 | 18 | 16 | 17 | 14 |
| IPR004827 | Basic-leucine zipper domain | 14 | 13 | 12 | 16 | 16 | 14 | 13 | 16 | 14 | 15 | 15 |
| IPR001878 | Zinc finger, CCHC-type | 10 | 13 | 11 | 10 | 10 | 10 | 15 | 15 | 12 | 11 | 8 |
| IPR009071 | High mobility group box domain | 9 | 9 | 9 | 9 | 9 | 9 | 9 | 10 | 9 | 9 | 8 |
| IPR001356 | Homeobox domain | 7 | 7 | 7 | 7 | 7 | 7 | 8 | 7 | 7 | 8 | 7 |
| IPR003958 | Transcription factor CBF/NF-Y/archaeal histone domain | 6 | 7 | 6 | 7 | 7 | 6 | 7 | 7 | 8 | 7 | 5 |
| IPR001594 | Palmitoyltransferase, DHHC domain | 5 | 4 | 5 | 4 | 4 | 4 | 5 | 5 | 4 | 4 | 6 |
| IPR003163 | Transcription regulator HTH, APSES-type DNA-binding domain | 5 | 5 | 5 | 5 | 5 | 4 | 5 | 4 | 5 | 4 | 5 |
| IPR000679 | Zinc finger, GATA-type | 4 | 6 | 5 | 5 | 5 | 6 | 6 | 6 | 6 | 6 | 6 |
| IPR006600 | HTH CenpB-type DNA-binding domain | 4 | 5 | 8 | 4 | 4 | 4 | 5 | 5 | 3 | 4 | 4 |
| IPR001606 | ARID DNA-binding domain | 4 | 4 | 4 | 4 | 4 | 4 | 4 | 4 | 4 | 4 | 4 |
| IPR001766 | Fork head domain | 4 | 4 | 5 | 4 | 4 | 4 | 5 | 5 | 4 | 4 | 4 |
| IPR004181 | Zinc finger, MIZ-type | 3 | 2 | 3 | 3 | 3 | 3 | 3 | 3 | 3 | 3 | 2 |
| IPR006565 | Bromodomain associated domain | 3 | 3 | 3 | 3 | 3 | 3 | 3 | 3 | 3 | 3 | 2 |
| IPR008967 | p53-like transcription factor, DNA-binding | 3 | 3 | 3 | 3 | 3 | 3 | 3 | 3 | 3 | 3 | 3 |
| IPR010666 | Zinc finger, GRF-type | 3 | 3 | 3 | 3 | 3 | 3 | 3 | 3 | 2 | 1 | 2 |
| IPR001222 | Zinc finger, TFIIS-type | 2 | 2 | 2 | 2 | 2 | 2 | 2 | 2 | 2 | 2 | 1 |
| IPR002100 | Transcription factor, MADS-box | 2 | 3 | 2 | 3 | 3 | 3 | 2 | 2 | 2 | 3 | 2 |
| IPR003150 | DNA-binding RFX-type winged-helix domain | 2 | 2 | 2 | 2 | 2 | 2 | 2 | 2 | 2 | 2 | 2 |
| IPR010982 | Lambda repressor-like, DNA-binding domain superfamily | 2 | 2 | 2 | 2 | 2 | 2 | 2 | 2 | 2 | 2 | 2 |
| IPR001387 | Cro/C1-type helix-turn-helix domain | 2 | 2 | 2 | 2 | 2 | 2 | 2 | 2 | 2 | 2 | 2 |
| IPR000116 | High mobility group protein HMGA | 1 | 1 | 1 | 1 | 1 | 1 | 1 | 1 | 1 | 1 | 1 |
| IPR000818 | TEA/ATTS domain | 1 | 1 | 1 | 1 | 1 | 1 | 1 | 1 | 1 | 1 | 1 |
| IPR000967 | Zinc finger, NF-X1-type | 1 | 1 |  | 1 | 1 | 1 | 1 | 1 | 1 |  |  |
| IPR001289 | Nuclear transcription factor Y subunit A | 1 | 1 | 1 | 1 | 1 | 1 | 1 | 1 | 1 | 1 | 1 |
| IPR001510 | Zinc finger, PARP-type | 1 | 1 | 1 | 1 | 1 | 1 | 1 | 1 | 1 | 1 | 1 |
| IPR002059 | Cold-shock protein, DNA-binding | 1 | 1 | 1 | 1 | 1 | 1 | 1 | 1 | 1 | 1 | 1 |
| IPR003120 | Transcription factor Ste12 | 1 | 1 | 1 | 1 | 1 | 1 | 1 | 1 | 1 | 1 | 1 |
| IPR005011 | SNU66/SART1 family | 1 | 1 | 1 | 1 | 1 | 1 | 1 | 1 | 1 | 1 | 1 |
| IPR007196 | CCR4-Not complex component, Not1, C-terminal | 1 | 1 | 1 | 1 | 1 | 1 | 1 | 1 | 1 | 1 | 1 |
| IPR007604 | CP2 transcription factor | 1 | 1 | 1 | 1 | 1 | 1 | 1 | 1 | 1 | 1 | 1 |
| IPR008895 | Vps72/YL1 family | 1 | 1 | 1 | 1 | 1 | 1 | 1 | 1 | 1 | 1 | 1 |
| IPR009044 | ssDNA-binding transcriptional regulator | 1 | 1 | 1 | 1 | 1 | 1 | 1 | 1 | 1 | 1 | 1 |
| IPR010770 | Ecd family | 1 | 1 | 1 | 1 | 1 | 1 | 1 | 1 | 1 | 1 | 1 |
| IPR003656 | Zinc finger, BED-type predicted | 1 | 4 | 1 | 1 | 1 |  | 16 | 4 | 1 | 1 | 1 |
| IPR006856 | Mating-type protein MAT alpha 1, HMG-box | 1 | 1 | 1 | 1 | 1 |  | 1 | 1 |  |  | 1 |
| IPR007087 | Zinc finger, C2H2-typea |  |  |  |  |  |  |  |  |  |  |  |
| IPR011991 | Winged helix repressor DNA-bindinga |  |  |  |  |  |  |  |  |  |  |  |
| IPR006642 | Zinc finger, Rad18-type putativea |  |  |  |  |  |  |  |  |  |  |  |
| IPR003956 | Histone-like transcription factor CBF/NF-Y/archaeal histone, subunit Aa |  |  |  |  |  |  |  |  |  |  |  |
| IPR004022 | DDTa |  |  |  |  |  |  |  |  |  |  |  |
| IPR000637 | HMG-I/HMG-Y, DNA-binding, conserved sitea |  |  |  |  |  |  |  |  |  |  |  |
| IPR009395b |  |  |  |  |  |  |  |  |  |  |  |  |
| IPR007396b |  |  |  |  |  |  |  |  |  |  |  |  |
| IPR007889b |  |  |  |  |  |  |  |  |  |  |  |  |

Mrob (*M. robertsii* ARSEF23); ManiB (*M. anisopliae* BRIP53293); ManiA (*M. anisopliae* ARSEF549); ManiE (*M. anisopliae* E6); Mbru (*M. brunneum* ARSEF3297); Mgui (*M. guizhouense* ARSEF977); Mmaj (*M. majus* ARSEF297); Macr (*M. acridum* CQMa102); Malb (*M. album* ARSEF1941) and Mril (*M. rileyi* RCEF4871).

*Add in the list

a Not present in all *Metarhizium* proteins

b InterPro names different:

IPR009395 - GCN5-like 1 🡪 IPR009395 - Biogenesis of lysosome-related organelles complex 1 subunit 1

IPR007396 - Negative transcriptional regulator 🡪 IPR007396 - Transcriptional regulator PAI 2-type

IPR007889 - Helix-turn-helix, Psq 🡪 IPR007889 - DNA binding HTH domain, Psq-type
